# Supplementary material
Source: PubMed Central journal article supplement (PMC2224208)

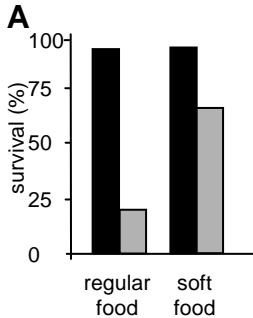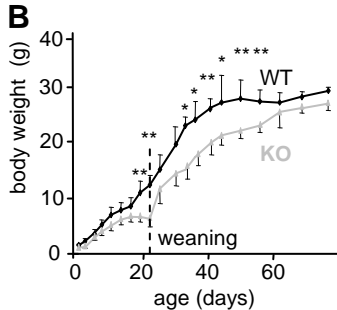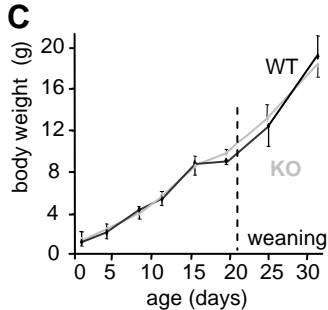

Supplement: pnas_0705487105_1.pdf [file pnas_0705487105_1.pdf]

**A**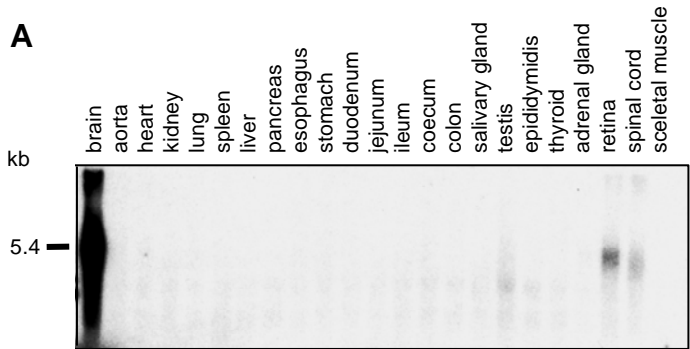**B**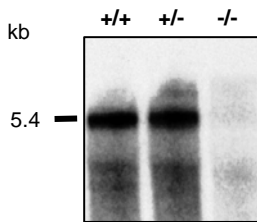**C**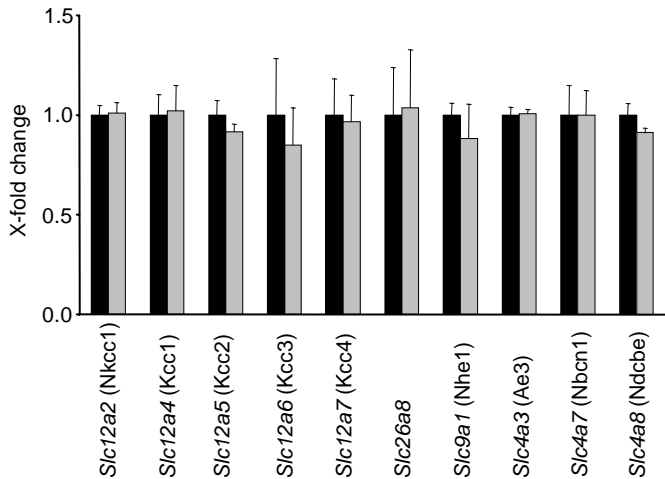

Supplement: pnas_0705487105_2.pdf [file pnas_0705487105_2.pdf]

**A**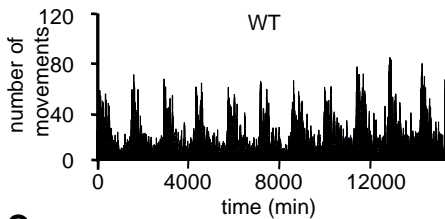**B**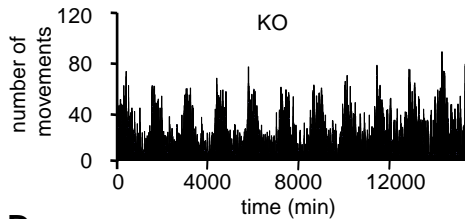**C**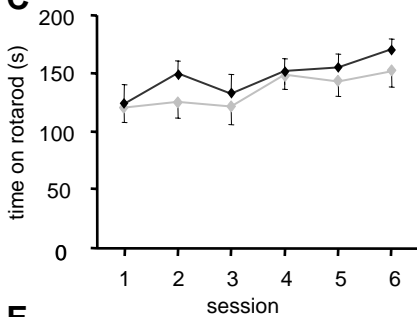**D**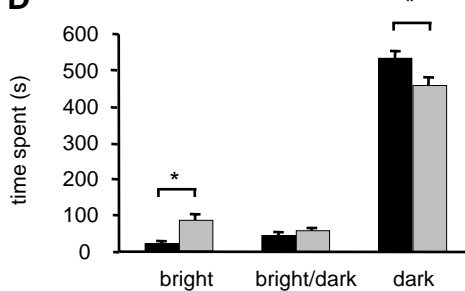**E**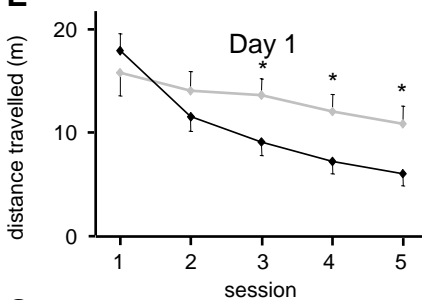**F**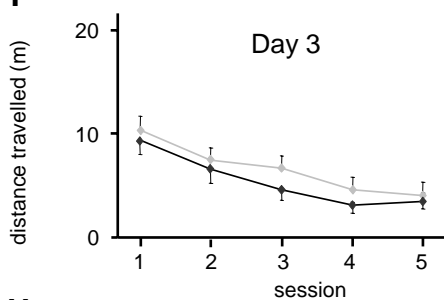**G**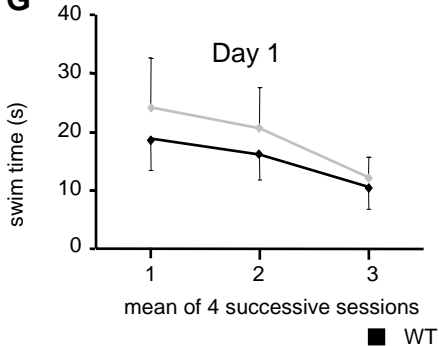**H**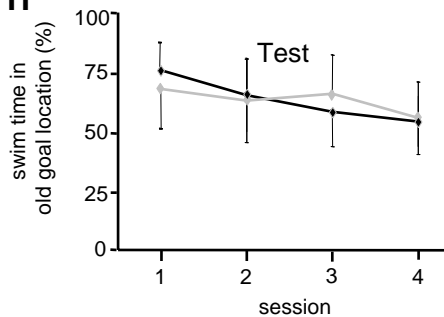

Supplement: pnas_0705487105_3.pdf [file pnas_0705487105_3.pdf]

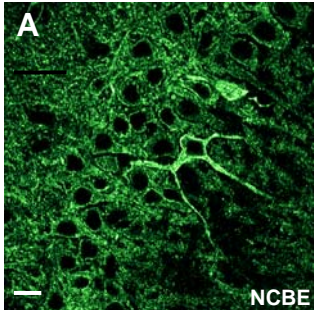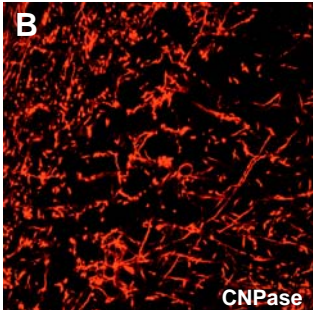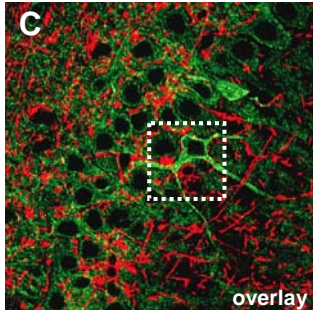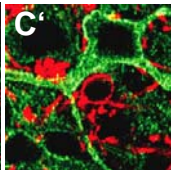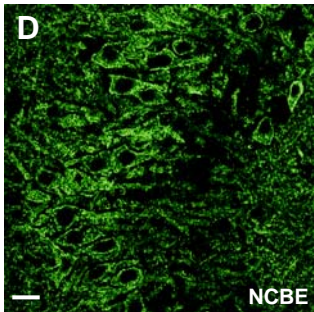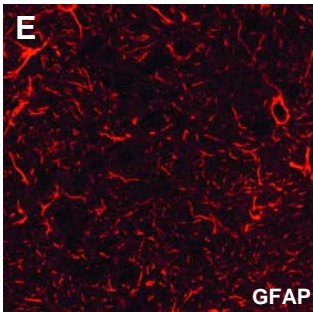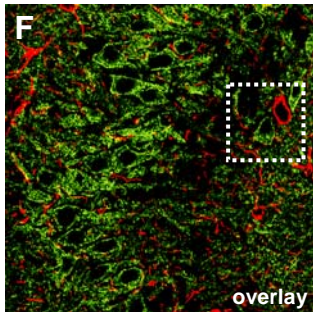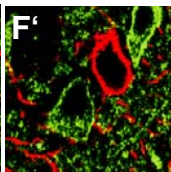

Supplement: pnas_0705487105_4.pdf [file pnas_0705487105_4.pdf]

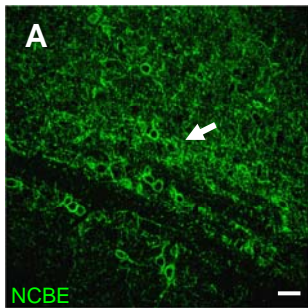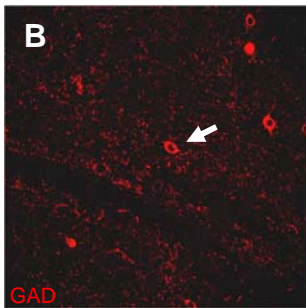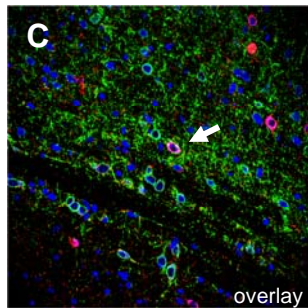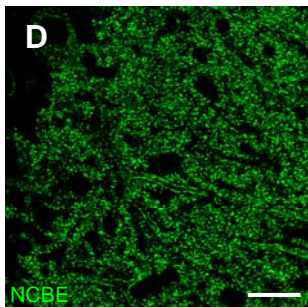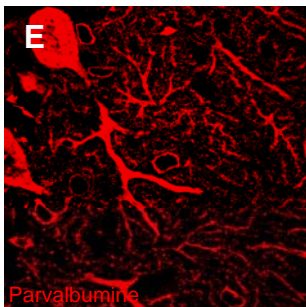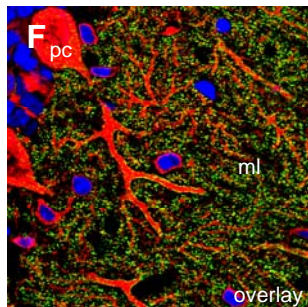

Supplement: pnas_0705487105_5.pdf [file pnas_0705487105_5.pdf]

**Slc4a10-WT**

**Slc4a10-KO**

**ADC**

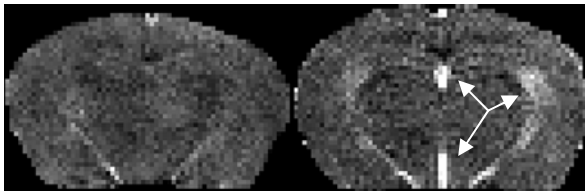

**T2**

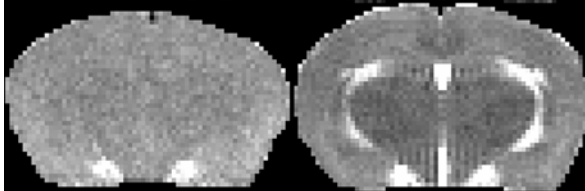

**T2w**

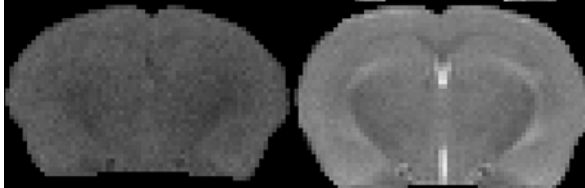

Supplement: pnas_0705487105_6.pdf [file pnas_0705487105_6.pdf]

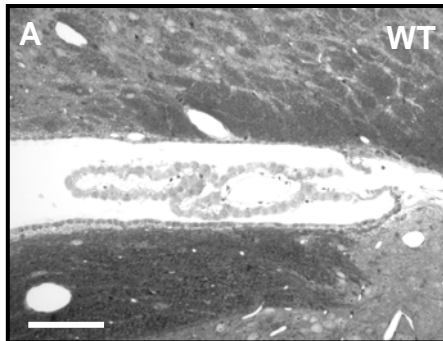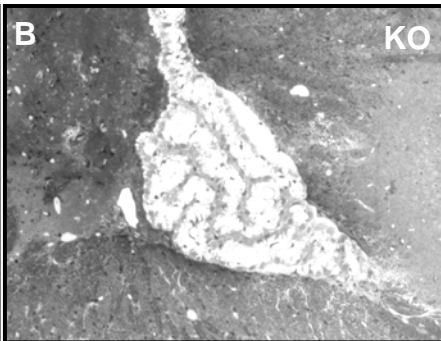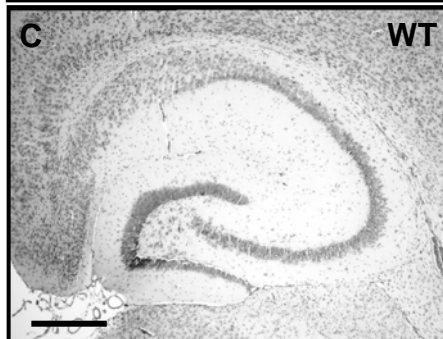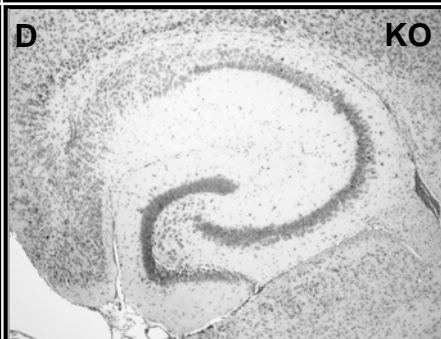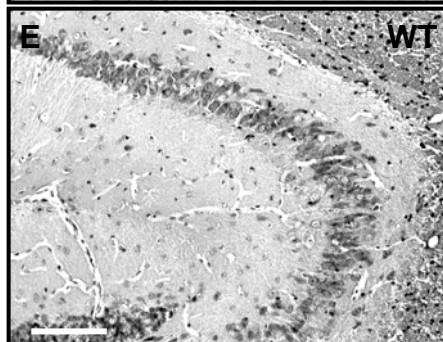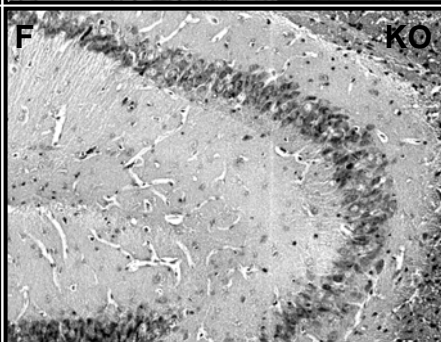

Supplement: pnas_0705487105_7.pdf [file pnas_0705487105_7.pdf]
